# Supplementary material for: Shroom3 contributes to the maintenance of the glomerular filtration barrier integrity
Source: HighWire-hosted journal article supplement (doi:10.1101/gr.182881.114), 2014-10-01
Supplement: Supplemental_Material.pdf [file Supplemental_Material.pdf]

## ***Shroom3* contributes to the maintenance of the glomerular filtration barrier integrity**

**Nan Cher Yeo<sup>1,2,12</sup>, Caitlin C. O'Meara<sup>1,2,12</sup>, Jason A. Bonomo<sup>3,4</sup>, Kerry N. Veth<sup>5</sup>, Ritu Tomar<sup>6</sup>, Michael J. Flister<sup>1,2</sup>, Iain A. Drummond<sup>6,7</sup>, Donald W. Bowden<sup>4,8</sup>, Barry I. Freedman<sup>4,9</sup>, Jozef Lazar<sup>1,10</sup>, Brian A. Link<sup>5</sup>, Howard J. Jacob<sup>1,2,11,13</sup>**

### **Affiliations:**

<sup>1</sup>Human and Molecular Genetics Center

<sup>2</sup>Department of Physiology

Medical College of Wisconsin, Milwaukee, WI, USA.

<sup>3</sup>Department of Molecular Medicine and Translational Science

<sup>4</sup>Center for Genomics and Personalized Medicine Research

Wake Forest School of Medicine, Winston-Salem, NC, USA.

<sup>5</sup>Department of Cell Biology, Neurobiology and Anatomy, Medical College of Wisconsin, Milwaukee, WI, USA.

<sup>6</sup>Nephrology Division, Massachusetts General Hospital, Boston, MA, USA.

<sup>7</sup>Department of Genetics, Harvard Medical School, Boston, MA, USA.

<sup>8</sup>Department of Biochemistry

<sup>9</sup>Section on Nephrology, Department of Internal Medicine

Wake Forest School of Medicine, Winston-Salem, NC, USA.

<sup>10</sup>Department of Dermatology

<sup>11</sup>Department of Pediatrics

Medical College of Wisconsin, Milwaukee, WI, USA.

<sup>12</sup>These authors contributed equally to this work.

<sup>13</sup>Correspondence to:

Howard J. Jacob

Medical College of Wisconsin

8701 Watertown Plank Rd.

Milwaukee, WI 53226

Ph: (414) 456-4887

Fax: (414) 456-6516

[jacob@mcw.edu](mailto:jacob@mcw.edu)

## Supplemental materials

**Supplemental Table 1.** *SHROOM3* variants associated with renal functional traits identified through GWAS. Expression SNP is denoted in bold.

| Strongest SNP                          | Chr:Position                     | Trait                                    | First Author/Date/ Journal/ Study                                                                                                                                                                        |
|----------------------------------------|----------------------------------|------------------------------------------|----------------------------------------------------------------------------------------------------------------------------------------------------------------------------------------------------------|
| rs17319721                             | 4:77587871                       | eGFRcrea                                 | Kottgen <i>et al.</i> /June 2009/ <i>Nature Genet.</i> /Multiple loci associated with indices of renal function and chronic kidney disease                                                               |
| rs17319721;<br><b>rs4256249 (eSNP)</b> | 4:77587871;<br><b>4:77677603</b> | eGFRcrea,<br>eGFRcys;<br><b>eGFRcrea</b> | Kottgen <i>et al.</i> /May2010/ <i>Nature Genet.</i> /New loci associated with kidney function and chronic kidney disease                                                                                |
| rs9992101                              | 4: 77579455                      | Serum creatinine                         | Chambers <i>et al.</i> /May2010/ <i>Nature Genet.</i> / Genetic loci influencing kidney function and chronic kidney disease                                                                              |
| rs13146355                             | 4:77631164                       | eGFR                                     | Meyer <i>et al.</i> /Aug 2010/ <i>PLoS Genet.</i> / Genome-wide association studies of serum magnesium, potassium, and sodium concentrations identify six Loci influencing serum magnesium levels        |
| rs4859682                              | 4: 77629342                      | Serum creatinine                         | Pattaro <i>et al.</i> /Mar 2010/ <i>BMC Med Genet.</i> / A meta-analysis of genome-wide data from five European isolates reveals an association of COL22A1, SYT1, and GABRR2 with serum creatinine level |
| rs17319721                             | 4:77587871                       | Incident CKD                             | Böger <i>et al.</i> /Sep 2011/ <i>PLoS Genet.</i> / Association of eGFR-Related Loci Identified by GWAS with Incident CKD and ESRD                                                                       |
| rs17319721                             | 4:77587871                       | UACR, albuminuria                        | Ellis <i>et al.</i> /Jul 2012/ <i>Hum Mol Genet.</i> / Validated SNPs for eGFR and their associations with albuminuria                                                                                   |
| rs13146355                             | 4:77631164                       | Serum creatinine, eGFRcrea               | Okada <i>et al.</i> /Jul 2012/ <i>Nature Genet.</i> / Meta-analysis identifies multiple loci associated with kidney function-related traits in east Asian populations                                    |

**Abbreviation:** Chr: chromosome; SNP: single nucleotide polymorphism; eGFRcrea: glomerular filtration rate, estimated by serum creatinine; eGFRcys: glomerular filtration rate, estimated by cystatin c; CKD: chronic kidney disease; UACR: urinary-to-albumin ratio; eSNP: expression SNP. SNP position is based on NCBI36/hg18 assembly.

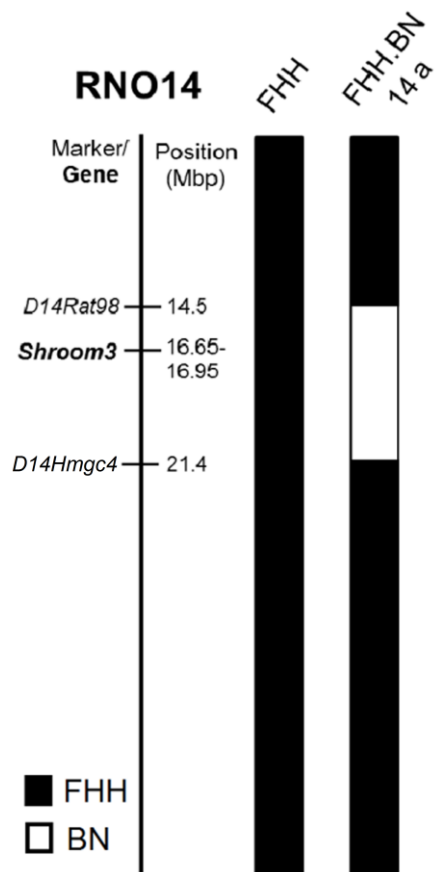

**Supplemental Figure 1.** Genetic makeup of the parental FHH and FHH.BN14a congenic rat chromosome 14 (RNO14). A 6.1 Mb region (flanking markers: *D14Rat98-D14Hmgc4*) on chromosome 14 containing *Shroom3* gene from the BN rat was introgressed onto the genetic background of the FHH strain.

**Supplemental Table 2.** Non-synonymous variants in the 6.1 Mb congenic region between FHH and FHH.BN14a rats.

| Position | Gene Symbol    | BN nt | FHH nt | AA Change | Polyphen Prediction |
|----------|----------------|-------|--------|-----------|---------------------|
| 16670605 | <i>Shroom3</i> | T     | C      | N1704S    | Benign              |
| 16670607 | <i>Shroom3</i> | C     | G      | E1703D    | Benign              |
| 16670618 | <i>Shroom3</i> | C     | T      | V1700M    | Possibly damaging   |
| 16672808 | <i>Shroom3</i> | C     | T      | R1432Q    | Possibly damaging   |
| 16673036 | <i>Shroom3</i> | G     | A      | A1356V    | Possibly damaging   |
| 16673231 | <i>Shroom3</i> | T     | C      | Y1291C    | Benign              |
| 16682736 | <i>Shroom3</i> | C     | T      | G1073S    | Possibly damaging   |
| 16683924 | <i>Shroom3</i> | T     | C      | S677G     | Possibly damaging   |
| 16684146 | <i>Shroom3</i> | G     | A      | L603F     | Benign              |
| 16684310 | <i>Shroom3</i> | C     | G      | R548T     | Benign              |
| 16684341 | <i>Shroom3</i> | T     | C      | M538V     | Benign              |
| 16684422 | <i>Shroom3</i> | C     | T      | A511T     | Probably damaging   |
| 17032887 | <i>Stbd1</i>   | C     | G      | S248T     | Benign              |
| 17033136 | <i>Stbd1</i>   | G     | A      | P165L     | Benign              |
| 17033161 | <i>Stbd1</i>   | C     | A      | A157S     | Possibly damaging   |
| 17220659 | <i>Art3</i>    | C     | G      | S109T     | Benign              |
| 17220661 | <i>Art3</i>    | C     | G      | Q108H     | Possibly damaging   |
| 17380227 | <i>Ppef2</i>   | A     | G      | M396V     | Benign              |
| 17382773 | <i>Ppef2</i>   | G     | A      | E454K     | Benign              |
| 17421453 | <i>Uso1</i>    | A     | G      | L776S     | Benign              |
| 18078065 | <i>Parm1</i>   | C     | T      | A102T     | Benign              |

Abbreviation: nt: nucleotide; AA: amino acid. Variant positions and gene symbols are based on rat RGSC3.4 genome assembly and RefSeq database.

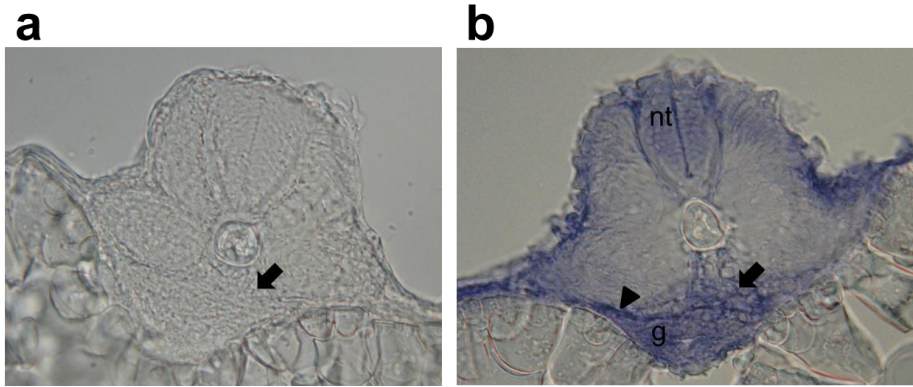

**Supplemental Figure 2.** Zebrafish *shroom3* transcript expression was detected in the pronephros by *in situ* hybridization (ISH). ISH against *shroom3* transcript was performed on 48 hours post fertilization wild-type embryos, using (a) sense-strand probe (negative control) and (b) antisense-strand probe. Transverse cross sections at the embryo midline showed *shroom3* expression in the glomerulus (arrow), pronephric tubule (arrowhead), neural tube (nt), and gut (g).

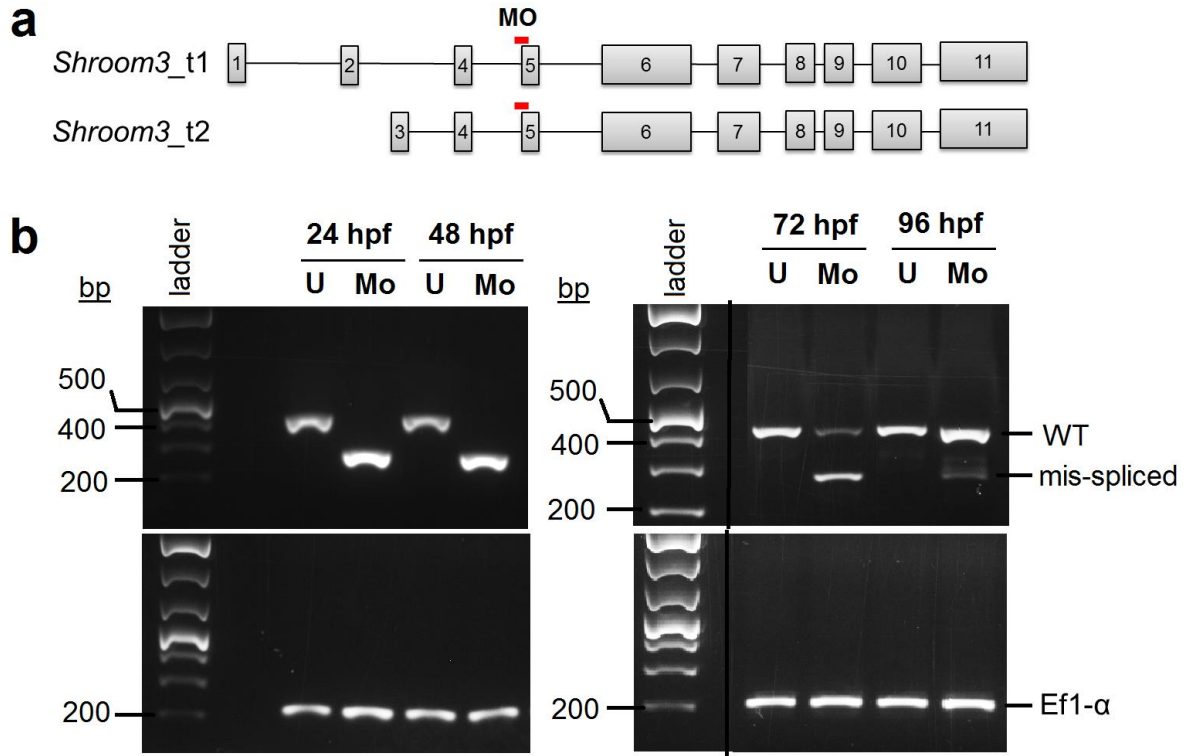

**Supplemental Figure 3.** Morpholino (MO) injections affect splicing of *shroom3* transcript in zebrafish. (a) The *shroom3* MO was designed to target the intron splice-acceptor site upstream of *shroom3* exon 5. Red horizontal line indicates the binding-site of *shroom3* MO on the two *shroom3* transcript splice-variants, t1 (accession number: JX455752) and t2 (accession number: JX455753) (zebrafish *shroom3* sequence was published previously by Ernst et al. 2012). (b) PCR analysis indicated that the *shroom3* MO disrupted proper splicing of the zebrafish *shroom3* transcript. The effect of MO lasted for at least 72 hours post fertilization (hpf). Partial recovery of wild-type *shroom3* mRNA by 96 hours post fertilization (hpf) may have underestimated the effect of *shroom3*-deficiency. We therefore engineered continuous expression of a *shroom3* dominant negative as a mean to validate the effect of *shroom3* on glomerular filtration barrier function. (bp= base pair, U= Uninjected control, Mo= Morphant)

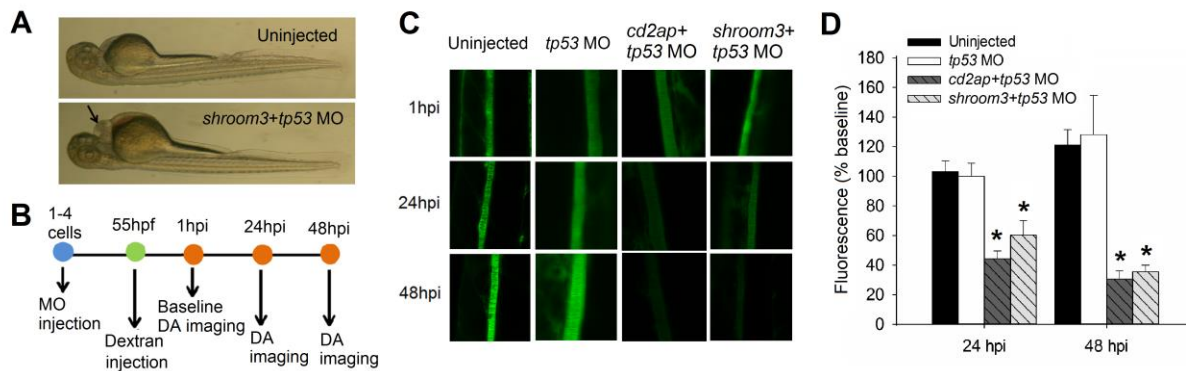

**Supplemental Figure 4.** Knockdown of *shroom3* by morpholino (MO) causes cardiac edema and increased glomerular permeability. (A) At 3 days post fertilization (dpf), uninjected control zebrafish developed normally. Injection of *shroom3+tp53* MO resulted in cardiac edema (indicated by arrow). (B) Shown is the protocol for the 70-kDa FITC-labeled dextran clearance assay. (C) Representative fluorescence images of individual dorsal aorta at 1, 24, and 48 hours post injection (hpi) for each group are shown. (D) FITC intensity was measured in relation to the intensity at 1 hpi. Both uninjected and *tp53* MO injected zebrafish had preserved FITC intensity at 24 and 48 hpi. Injection of *cd2ap+tp53* MO or *shroom3+tp53* MO caused significantly decreased FITC signal, suggesting that knockdown of *cd2ap* or *shroom3* disrupts glomerular filtration barrier size selectivity, therefore increasing the rate of dextran clearance. \*p<0.05 vs. uninjected and *tp53* MO-injected zebrafish

**Supplemental Table 3.** Clinical characteristics of subjects used in targeted genotyping of *SHROOM3*.

|                                      | Controls    | Non-diabetic ESKD |
|--------------------------------------|-------------|-------------------|
| <i>N</i>                             | 760         | 1705              |
| Age (years)                          | 48.4 ± 12.7 | 54.6 ± 14.6       |
| Female (%)                           | 57.9        | 43.7              |
| Body mass index (kg/m <sup>2</sup> ) | 29.2 ± 7.4  | 27.2 ± 6.98       |
| Fasting serum glucose (mg/dL)        | 89.2 ± 13.6 | 88.6 ± 8.66       |
| Duration of ESKD (years)             | -           | 2.2 ± 1.64        |
| Blood urea nitrogen (mg/dL)          | 13.3 ± 4.5  | -                 |
| Serum creatinine (mg/dL)             | 1.03 ± 0.46 | -                 |

Abbreviation: ESKD: End-stage kidney disease



**Supplemental Table 4.** Association results of all genotyped variants in *SHROOM3* with non-diabetic end-stage kidney disease in African Americans. (Statistically significant SNPs are denoted in bold)

**A. Coding and splice-site variants**

| SNP                | Position (HG19) | N (Case/Contro)  | MAF (Case/Control)   | P            | OR          | 95% CI            |
|--------------------|-----------------|------------------|----------------------|--------------|-------------|-------------------|
| rs191518122        | 77550139        | 1446/1087        | 0.0038/0.0023        | 0.47         | 1.53        | 0.48-4.88         |
| rs141460234        | 77631216        | 1455/1095        | 0/0.0005             | -            | -           | ---               |
| rs139587539        | 77659907        | 1457/1105        | 0/0                  | -            | -           | ---               |
| rs146652221        | 77660381        | 1455/1091        | 0.001/0.0018         | 0.82         | 1.19        | 0.25-5.6          |
| 4:77660512         | 77660512        | 1457/1110        | 0/0                  | -            | -           | ---               |
| 4:77660518         | 77660518        | 1474/1057        | 0.0003/0             | -            | -           | ---               |
| rs344141           | 77660731        | 1475/1055        | 0.4217/0.42          | 0.2          | 1.13        | 0.94-1.36         |
| rs144001652        | 77660860        | 1446/1089        | 0.0014/0.0028        | 0.15         | 0.29        | 0.05-1.59         |
| rs76656494         | 77661017        | 1455/1098        | 0.0017/0.0032        | 0.79         | 0.85        | 0.24-2.94         |
| rs140229037        | 77661127        | 1474/1048        | 0/0.0014             | -            | -           | ---               |
| rs61741135         | 77661704        | 1454/1104        | 0.0079/0.0072        | 0.91         | 1.04        | 0.51-2.13         |
| 4:77661996         | 77661996        | 1456/1112        | 0/0                  | -            | -           | ---               |
| rs113001394        | 77662014        | 1472/1055        | 0.0003/0.0005        | 0.47         | 2.96        | 0.15-57.03        |
| rs371443861        | 77662106        | 1431/1100        | 0.0003/0.0014        | 0.86         | 0.8         | 0.07-9.18         |
| rs145035894        | 77662157        | 1470/1041        | 1/1                  | 2            | 2           | 2-2               |
| rs147732653        | 77662361        | 1489/1144        | 0.0007/0.0026        | 0.29         | 0.41        | 0.08-2.13         |
| COSM1431111        | 77662378        | 1455/1112        | 0/0                  | -            | -           | ---               |
| 4:77662502         | 77662502        | 1462/1154        | 0/0                  | -            | -           | ---               |
| <b>rs181194611</b> | <b>77663057</b> | <b>1463/1081</b> | <b>0.0062/0.0009</b> | <b>0.014</b> | <b>7.95</b> | <b>1.53-41.46</b> |
| rs141613065        | 77663058        | 1480/1045        | 0.0034/0.0024        | 0.41         | 0.57        | 0.15-2.17         |

## B. Non-coding variants

| SNP                                     | Position (HG19) | N (Case/Control) | MAF (Case/Control) | P                          | OR          | 95% CI           |
|-----------------------------------------|-----------------|------------------|--------------------|----------------------------|-------------|------------------|
| rs13136800                              | 77364746        | 1456/1105        | 0.091/0.078        | 0.045                      | 1.28        | 1.01-1.63        |
| rs12640246                              | 77368470        | 1449/1104        | 0.23/0.22          | 0.61                       | 1.05        | 0.87-1.26        |
| rs4859678                               | 77386372        | 1476/1034        | 0.1829/0.16        | 0.51                       | 1.07        | 0.88-1.29        |
| rs1511817                               | 77386678        | 1452/1091        | 0.41/0.41          | 0.77                       | 1.03        | 0.85-1.24        |
| rs11721509                              | 77433888        | 1451/1085        | 0.17/0.16          | 0.82                       | 0.98        | 0.81-1.19        |
| rs4859688                               | 77439979        | 1325/686         | 0.43/0.41          | 0.4 <sup>a</sup>           | 1.06        | 0.92-1.22        |
| <b>rs17002091</b>                       | <b>77500947</b> | <b>1449/1102</b> | <b>0.13/0.15</b>   | <b>0.037<sup>a,b</sup></b> | <b>0.83</b> | <b>0.7-0.99</b>  |
| <b>rs72868158</b>                       | <b>77528915</b> | <b>1290/670</b>  | <b>0.11/0.12</b>   | <b>0.016</b>               | <b>0.73</b> | <b>0.57-0.94</b> |
| rs6838801                               | 77549559        | 1327/682         | 0.26/0.26          | 0.61 <sup>a</sup>          | 1.04        | 0.89-1.22        |
| rs6532535                               | 77562538        | 1318/685         | 0.47/0.47          | 0.59 <sup>a</sup>          | 1.04        | 0.9-1.2          |
| rs4859456                               | 77562958        | 1335/684         | 0.47/0.47          | 0.52 <sup>a</sup>          | 1.05        | 0.91-1.21        |
| rs13114029                              | 77575268        | 1457/1102        | 0.019/0.02         | 0.8                        | 0.94        | 0.59-1.51        |
| rs13108785                              | 77576070        | 1329/685         | 0.34/0.32          | 0.063 <sup>a</sup>         | 1.15        | 0.99-1.34        |
| rs151021596                             | 77638937        | 1450/1098        | 0.011/0.011        | 0.72                       | 0.9         | 0.49-1.64        |
| rs11735292                              | 77653298        | 1475/1053        | 0.0319/0.039       | 0.26                       | 0.81        | 0.57-1.16        |
| rs344137                                | 77654812        | 1325/678         | 0.16/0.17          | 0.43 <sup>a</sup>          | 0.93        | 0.76-1.12        |
| <b>rs17002201</b>                       | <b>77681958</b> | <b>1448/1089</b> | <b>0.17/0.19</b>   | <b>0.015<sup>a,b</sup></b> | <b>0.83</b> | <b>0.71-0.96</b> |
| 4:7700260                               | 77700260        | 1475/1050        | 0.0003/0.001       | 0.56                       | 0.48        | 0.04-5.4         |
| <b>rs72663250 (proxy to rs55650799)</b> | <b>77708325</b> | <b>1326/684</b>  | <b>0.13/0.16</b>   | <b>0.037<sup>a</sup></b>   | <b>0.81</b> | <b>0.67-0.99</b> |

Association values are adjusted for admixture, gender, and *APOL1* genotype, using either dominant model or additive model (indicated by superscript 'a'). Values adjusted for admixture and *APOL1* genotypes were indicated by superscript 'b'. Abbreviations: MAF= minor allele frequency; OR= odds ratio; 95% CI= 95% confidence interval.

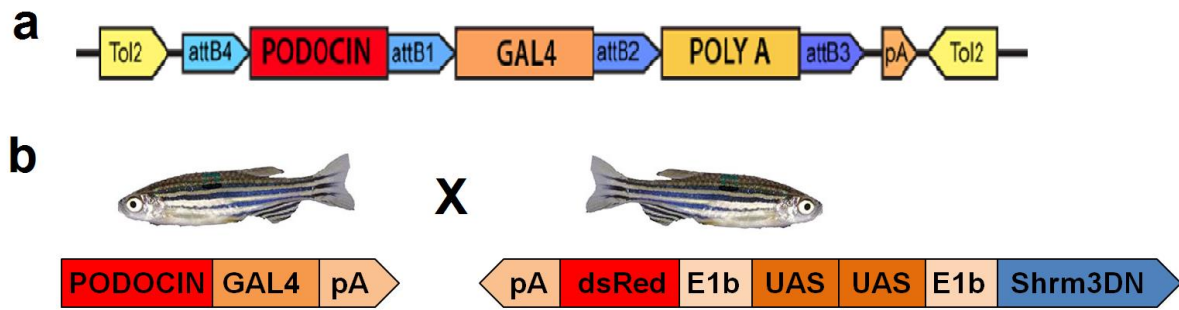

**Supplemental Figure 5.** Generation of podocyte-specific *shroom3* dominant negative (shrm3DN) mutant zebrafish. (a) Schematic of the final expression construct, pDestTol2CG2;podocin:Gal4VP16:polyA, is provided. (b) To generate podocyte-specific shrm3DN mutant, we crossed the *podocin*:GAL4 transgenic fish with a transgenic line that had constitutive expression of a UAS linked to shrm3DN and dsRed mCherry allele. dsRed mCherry expression in podocytes was used as a marker to select offspring with *podocin*:Gal4;*UAS*:shrm3DN expression.

**Supplemental Table 5.** FHH rat harbors non-synonymous variants in several genes that have been identified by genome-wide association studies for chronic kidney disease.

| Gene          | Chromosome | Genomic Position | BN | FHH |
|---------------|------------|------------------|----|-----|
| <i>Umod</i>   | 1          | 177,741,029      | C  | G   |
| <i>Umod</i>   | 1          | 177,741,245      | T  | C   |
| <i>Dab2</i>   | 2          | 55,727,505       | A  | G   |
| <i>Dab2</i>   | 2          | 55,727,598       | G  | C   |
| <i>Dab2</i>   | 2          | 55,727,668       | G  | C   |
| <i>Mecom</i>  | 2          | 114,844,878      | C  | T   |
| <i>Ino80</i>  | 3          | 105,941,054      | A  | G   |
| <i>Ino80</i>  | 3          | 105,979,571      | G  | T   |
| <i>Ino80</i>  | 3          | 105,979,617      | G  | C   |
| <i>Gnas</i>   | 3          | 165,214,394      | T  | G   |
| <i>Alms1</i>  | 4          | 119,859,053      | C  | G   |
| <i>Alms1</i>  | 4          | 119,867,722      | T  | C   |
| <i>Alms1</i>  | 4          | 119,877,408      | G  | C   |
| <i>Alms1</i>  | 4          | 119,879,053      | A  | G   |
| <i>Alms1</i>  | 4          | 119,879,086      | T  | C   |
| <i>Alms1</i>  | 4          | 119,885,426      | C  | T   |
| <i>Alms1</i>  | 4          | 119,885,860      | C  | A   |
| <i>Prkag2</i> | 4          | 5,659,266        | A  | G   |
| <i>Casp9</i>  | 5          | 160,711,084      | T  | C   |
| <i>Tfdp2</i>  | 8          | 101,256,460      | A  | G   |
| <i>Tfdp2</i>  | 8          | 101,390,941      | G  | A   |
| <i>Aldh2</i>  | 12         | 36,109,675       | C  | T   |
| <i>Aldh2</i>  | 12         | 36,110,126       | G  | A   |
| <i>Aldh2</i>  | 12         | 36,110,183       | T  | C   |
| <i>Aldh2</i>  | 12         | 36,112,403       | C  | T   |
| <i>Aldh2</i>  | 12         | 36,114,800       | T  | C   |

Variant position and gene symbol are based on rat RGSC3.4 genome assembly, and sequence of FHH/EurMcwi (MCW) was compared to the BN reference genome. Genetic variants can be downloaded at the Rat Genome Database Variant Visualizer (<http://rgd.mcw.edu/rgdweb/front/select.html>).

**Supplemental Table 6.** Morpholino and PCR primer sequences used in the study

## Morpholino (MO) antisense oligonucleotide sequence

| MO-targeted gene | MO sequence (5' to 3')    |
|------------------|---------------------------|
| <i>shroom3</i>   | AGGCTCACTCCGTCTGTAAAAGAGA |
| <i>cd2ap</i>     | CATACTCCACCACCACCTCAACCAT |
| <i>tp53</i>      | GCGCCATTGCTTTGCAAGAATTG   |

## Zebrafish sequence primer used to assess morpholino-induced splicing defects

| Target<br>(F: forward, R: reverse) | Primer sequence (5' to 3') |
|------------------------------------|----------------------------|
| shroom3_1F                         | CGGACACTTTTGGTTTTTGG       |
| shroom3_1R                         | CTGTGGTCAAGGCTTTCCAT       |
| ef1- $\alpha$ _F                   | TCTCTCAATCTTGAACTTATCAATCA |
| ef1- $\alpha$ _R                   | AACACCCAGGCGTACTTGAA       |

Zebrafish sequence primer used to generate *shroom3* in situ hybridization probe

| Target<br>(F:forward, R: reverse) | Primer sequence (5' to 3') |
|-----------------------------------|----------------------------|
| shroom3_2F                        | GGCCCTCAAGACTCAGACAG       |
| shroom3_2R                        | GCCCCCTTTAGGTTCTCAAA       |

Rat sequence primer used to amplify full-length *Shroom3* cDNA

| Target<br>(F:forward, R:reverse) | Primer sequence (5' to 3') |
|----------------------------------|----------------------------|
| Shroom3_1F                       | ATGAGGACCCCCGAGAACTTG      |
| Shroom3_1R                       | TCAAGCTGTGAGCGGTAACC       |
| Shroom3_2F                       | GGTTACCGCTCACAGCTTGA       |
| Shroom3_2R                       | GGTTAAAGAGGAGAGGTCAACG     |

Primers used for site-directed mutagenesis

| Target<br>(F:forward, R:reverse) | Primer sequence (5' to 3')   |
|----------------------------------|------------------------------|
| ΔG1073S_F                        | GCTCCACGCTCAGCCTGTCTGGCC     |
| ΔG1073S_R                        | AGGCCTTGCTGTGCGCTCGAA        |
| ΔY1291C_F                        | CTCTCAGCTGCTCGGACAGAGGCCA    |
| ΔY1291C_R                        | GCCTAGATCCAGGGCCAGCCAA       |
| ΔA1356V_F                        | AGATGCCAGAGTCTCCTCCGTG       |
| ΔA1356V_R                        | GGGAAGTGGCCGTGCATTCCTG       |
| ΔP1244L_F                        | CGCCAGGATGTGCTTTTGGGCAAGACAG |
| ΔP1244L_R                        | CTTGTCTGCGGTGGCGAGAGATGACCT  |
